# Supplementary material
Source: MDPI journal article supplement (https://www.mdpi.com/2673-4532/4/2/10)

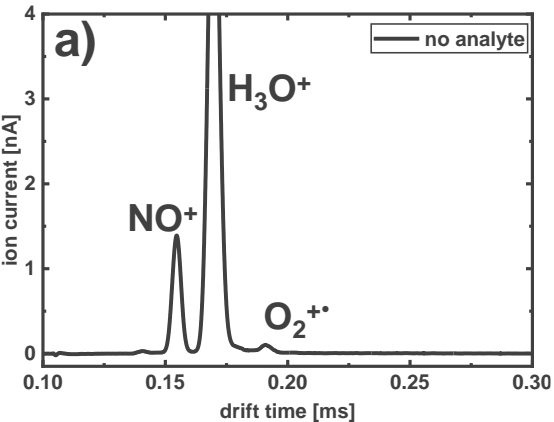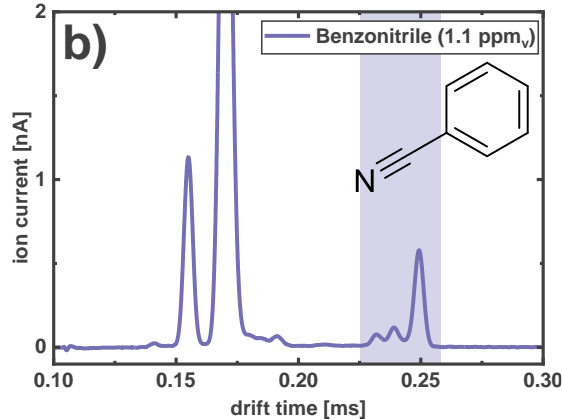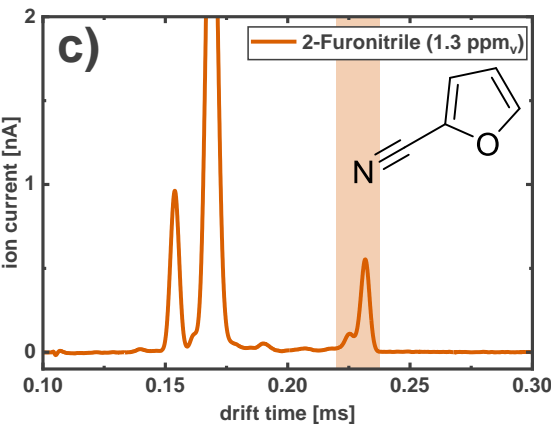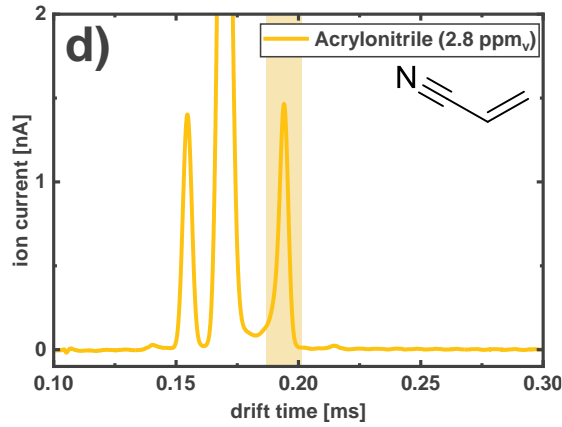

Supplement: s1 [file s1]
